# Supplementary material for: Metformin Prevents Nonunion after Three-Cannulated-Screw Fixation in Displaced Femoral Neck Fractures: A Retrospective Study
Source: Biomed Res Int. 2016 Nov 20;2016:5682541. doi: 10.1155/2016/5682541 (PMC5136386; doi:10.1155/2016/5682541)
Supplement: Supplementary file 1 — Metformin, insulin, alpha-glucosidase inhibitor and secretagogue were most widely in treatment of T2DM. The usage of these therapies in each patient was therefore recorded and summarized. [file 5682541.f1.xlsx]

## Sheet: Sheet1
Metformin	Insulin	Alpha-glucosidase inhibitor	Secretagogue
No	Yes	No	No
No	Yes	No	Yes
No	No	No	No
Yes	Yes	No	Yes
Yes	Yes	No	No
No	No	Yes	No
Yes	No	No	Yes
Yes	No	No	No
Yes	Yes	No	Yes
No	No	No	Yes
Yes	Yes	No	Yes
Yes	No	No	Yes
Yes	Yes	No	No
Yes	No	No	Yes
Yes	Yes	No	No
Yes	No	No	No
No	No	No	Yes
Yes	Yes	No	No
Yes	No	No	No
Yes	No	No	Yes
Yes	No	No	Yes
Yes	No	No	Yes
No	Yes	No	No
No	Yes	Yes	Yes
No	Yes	No	No
Yes	Yes	No	Yes
Yes	No	Yes	No
Yes	Yes	No	Yes
No	No	No	No
Yes	Yes	No	No
Yes	No	No	Yes
Yes	No	Yes	No
Yes	No	Yes	Yes
No	Yes	Yes	No
Yes	No	Yes	Yes
No	No	No	No
Yes	Yes	No	No
No	Yes	No	No
No	No	No	No
Yes	No	No	No
Yes	No	No	Yes
Yes	Yes	Yes	No
Yes	Yes	No	No
Yes	Yes	Yes	Yes
Yes	No	No	No
Yes	Yes	No	No
Yes	No	No	No
Yes	Yes	No	No
No	Yes	No	No
Yes	Yes	No	Yes
Yes	Yes	No	No
Yes	Yes	Yes	No
Yes	No	Yes	No
Yes	Yes	Yes	No
No	Yes	No	Yes
Yes	Yes	No	No
Yes	No	No	No
Yes	Yes	No	Yes
No	No	Yes	No
No	Yes	No	Yes
No	No	No	No
Yes	No	No	Yes
No	Yes	No	Yes
No	Yes	No	No
No	No	No	No
Yes	No	No	No
No	No	No	No
No	Yes	Yes	Yes
No	Yes	No	Yes
Yes	Yes	No	No
No	No	Yes	Yes
Yes	No	Yes	Yes
Yes	Yes	No	No
Yes	No	No	No
No	No	No	No
No	Yes	No	Yes
Yes	No	Yes	No
Yes	Yes	Yes	Yes
No	Yes	No	No
Yes	Yes	No	No
Yes	No	No	No
Yes	No	No	No
Yes	Yes	No	No
Yes	No	Yes	No
No	No	No	Yes
Yes	No	No	Yes
No	Yes	No	No
Yes	No	No	No
Yes	Yes	No	Yes
Yes	Yes	No	Yes
No	No	No	No
No	Yes	No	Yes
Yes	Yes	No	No
No	Yes	No	No
Yes	Yes	No	Yes
Yes	Yes	Yes	No
Yes	Yes	No	No
No	Yes	No	Yes
No	No	No	Yes
Yes	Yes	No	No
No	No	No	No
No	No	No	No
Yes	Yes	No	Yes
Yes	No	No	No
No	No	No	No
Yes	No	No	No
Yes	No	Yes	No
Yes	Yes	Yes	No
Yes	No	No	Yes
No	No	No	No
Yes	Yes	No	No
Yes	No	No	No
Yes	Yes	No	No
Yes	Yes	No	No
No	Yes	No	Yes
No	Yes	No	No
Yes	No	No	No
No	No	No	Yes
No	Yes	No	Yes
Yes	Yes	Yes	Yes
No	No	No	Yes
Yes	Yes	Yes	Yes
Yes	No	No	Yes
Yes	Yes	No	No
Yes	No	Yes	No
No	Yes	No	No
No	Yes	No	Yes
No	Yes	No	No
No	Yes	Yes	Yes
Yes	No	No	No
Yes	No	No	No
No	Yes	Yes	Yes
Yes	Yes	No	No
Yes	Yes	No	No
Yes	Yes	No	No
Yes	No	No	No
No	Yes	Yes	No
Yes	No	No	No
Yes	No	No	No
Yes	Yes	No	No
No	No	No	No
